# Supplementary material
Source: PubMed Central journal article supplement (PMC2522339)
Supplement: JCI0832519sd.pdf [file JCI0832519sd.pdf]

**DATA SUPPLEMENT TO MANUSCRIPT**

**$\beta_3$ -adrenergic receptor activation increases human atrial tissue contractility  
and stimulates the L-type  $\text{Ca}^{2+}$  current**

**V. Arvydas Skeberdis,<sup>1</sup> Vida Gendvilienė,<sup>1</sup> Danguolė Zablockaitė,<sup>1</sup> Rimantas Treinys,<sup>1</sup>  
Regina Mačianskienė,<sup>1</sup> Andrius Bogdelis,<sup>1</sup> Jonas Jurevičius,<sup>1</sup>  
and Rodolphe Fischmeister<sup>2,3</sup>**

<sup>1</sup>*Institute of Cardiology, Kaunas University of Medicine, Kaunas, Lithuania.*

<sup>2</sup>*INSERM, UMR-S 769, Châtenay-Malabry, France.*

<sup>3</sup>*Univ. Paris-Sud 11, IFR141, Châtenay-Malabry, France.*

The authors have declared that no conflict of interest exists

**Nonstandard abbreviations used:**  $\beta$ -AR,  $\beta$ -adrenergic receptor;  $I_{\text{Ca,L}}$ , L-type  $\text{Ca}^{2+}$  channel current; HAM, human atrial myocyte; ISO, isoprenaline.

**Address correspondence to:**

Rodolphe Fischmeister  
INSERM UMR-S 769  
Faculté de Pharmacie, Université Paris-Sud 11  
5 Rue Jean-Baptiste Clément  
F-92296 Châtenay-Malabry  
France  
Tel.: 33-1-46 83 57 71  
Fax: 33-1-46 83 54 75  
E-mail: rodolphe.fischmeister@inserm.fr

## Results

***$\beta_3$ -AR agonists do not stimulate  $I_{Ca,L}$  in frog ventricular myocytes.*** The effects of the three  $\beta_3$ -AR agonists tested on  $I_{Ca,L}$  in HAMs were also tested in frog ventricular myocytes, where all the  $\beta$ -adrenergic stimulation of the current is mediated by  $\beta_2$ -ARs.(1) As shown in Supplemental Figure 1A, SR58611, at concentrations ranging from 1 nM to 1  $\mu$ M, had no effect on basal  $I_{Ca,L}$ . Moreover, it dose-dependently inhibited  $I_{Ca,L}$  prestimulated by the nonselective  $\beta$ -AR agonist ISO (1  $\mu$ M). This indicates that, at least in frog heart, SR58611 does not activate but instead inhibits  $\beta_2$ -ARs, possibly due to a very low agonistic efficacy for this  $\beta$ -AR subtype. In contrast, BRL37344, at concentrations ranging from 10 nM to 100  $\mu$ M, produced a dose-dependent stimulation of  $I_{Ca,L}$  (Supplemental Figure 1B). However, the effect of BRL37344 on frog  $I_{Ca,L}$  developed with an  $EC_{50}$  of  $536 \pm 93$  nM ( $n=3$ ), i.e. at concentrations >30-fold larger than those required to stimulate  $I_{Ca,L}$  in HAMs (Figure 1D in main article) and compatible with an activation of  $\beta_2$ -ARs.(2) Finally, CGP12177, at concentrations ranging from 1 nM to 10  $\mu$ M, had no effect on basal  $I_{Ca,L}$ , but dose-dependently antagonized the stimulatory effect of ISO (1  $\mu$ M, Supplemental Figure 1C), as expected from its  $\beta_2$ -AR antagonistic properties. Altogether, these results indicate that  $\beta_3$ -ARs are either not expressed or not positively coupled to  $I_{Ca,L}$  in frog ventricle. Moreover, none of the three  $\beta_3$ -AR agonists tested increased  $I_{Ca,L}$  in frog ventricle at concentrations at which they produced a clear effect in HAMs. Although differences must exist between human and frog  $\beta_2$ -AR subtype in their affinities and selectivities for the various pharmacological agents used here, this result lowers the likeliness that the stimulatory effect observed in HAMs was due to activation of  $\beta_2$ -ARs.

***$\beta_3$ -AR agonists do not stimulate  $I_{Ca,L}$  in rat ventricular myocytes.*** We next examined the possibility that the stimulatory effects of the three  $\beta_3$ -AR agonists on  $I_{Ca,L}$  in HAMs were mediated by activation of  $\beta_1$ -ARs. For this, we tested their effects on  $I_{Ca,L}$  in rat ventricular myocytes, where  $\beta_1$ - and  $\beta_2$ -ARs are co-expressed.(3) Neither CGP12177 (n=4, Supplemental Figure 2A) nor SR58611 (n=4, not shown), in the range of 1 nM to 1  $\mu$ M concentrations, had any significant effect on basal  $I_{Ca,L}$  in rat, but they both dose-dependently inhibited the stimulatory effect of ISO (100 nM) on  $I_{Ca,L}$  (Supplemental Figure 2B &C). Therefore, these two  $\beta_3$ -AR agonists behaved in rat ventricular myocytes just like in frog, and very differently from HAMs. As seen in Supplemental Figure 2D, BRL37344 exerted a slight <10% stimulation on basal  $I_{Ca,L}$  (n=4), but that effect was only seen at micromolar concentrations, i.e. at concentrations 50-fold higher than necessary to affect  $I_{Ca,L}$  in HAMs. As seen in Supplemental Figure 2D, that effect was negligible compared to the effect produced by 100 nM ISO. Altogether, these results indicate that  $\beta_3$ -ARs are either not expressed or not positively coupled to  $I_{Ca,L}$  in rat ventricle. Moreover, none of the three  $\beta_3$ -AR agonists tested increased  $I_{Ca,L}$  in rat ventricle at concentrations at which they produced an effect in HAMs. Although differences must exist between human and rat  $\beta_1$ -AR subtype in their affinities and selectivities for the various pharmacological agents used here, this result lowers the likelihood that the stimulatory effect observed in HAMs was due to activation of  $\beta_1$ -ARs.

## Methods

Our investigations conform with the European Community guiding principles in the care and use of animals (86/609/CEE), *CE Off J* n° L358, 18 December 1986) and the French decree n°87-848 of October 19, 1987 (*J of République Française*, 20 October 1987, pp. 12245-12248). Authorizations to perform animal experiments according to this decree were obtained from the French Ministère de l'Agriculture, de la Pêche et de l'Alimentation (n°7475, May 27, 1997).

**Frog ventricular myocytes.** Hearts from frog (*Rana esculenta*) were enzymatically dispersed by a combination of collagenase (Yakult) and trypsin (type XIII, Sigma) as described.(4) Frogs were killed by decapitation, the spinal cord was destroyed with a steel rod and the heart was then excised. The isolated cells were stored in storage Ringer solution, and kept at 4°C until use (2-48 hours after dissociation). In some isolations, amino acids were omitted from the dissociation and storage solutions, with no change in the results.

**Rat ventricular myocytes.** Adult rat ventricular myocytes were obtained by retrograde perfusion from hearts of male Wistar rats (160-180 g) as previously described.(5,6) The myocytes were maintained at 37°C until use.

**Solutions.** For electrophysiology, the control external solution contained (in mM): NaCl 107; HEPES 10; CsCl 20; NaHCO<sub>3</sub> 4; NaH<sub>2</sub>PO<sub>4</sub> 0.8; MgCl<sub>2</sub> 1.8; CaCl<sub>2</sub> 1.8; D-glucose 5; sodium pyruvate 5; tetrodotoxin 3x10<sup>-4</sup> (for frog) or 6x10<sup>-3</sup> (for rat); pH 7.4 adjusted with NaOH. Patch electrodes (0.6-1.5 Mohms) were filled with control internal solution which contained (in mM): CsCl 119.8; EGTA (acid form) 5; MgCl<sub>2</sub> 4; creatine phosphate disodium salt 5; Na<sub>2</sub>ATP 3.1; Na<sub>2</sub>GTP 0.42; CaCl<sub>2</sub> 0.062 (pCa 8.5); HEPES 10; pH 7.1 (frog) or 7.3 (rat)

adjusted with CsOH. Collagenase type A for rat cardiac myocyte dissociation and fetal calf serum were from Boehringer Mannheim (Germany). Collagenase for frog ventricular myocyte dissociation was from Yakult (Tokyo, Japan). DMEM was obtained from Gibco-BRL. Tetrodotoxin (TTX) was from Latoxan (Rosans, France). SR58611 was a generous gift of Sanofi Recherche (Montpellier, France). BRL37344 was a generous gift of SmithKline & Beecham (Saint-Grégoire, France). CGP12177 was a generous gift from Novartis Pharma (Rueil-Malmaison, France). L-748,337 was a generous gift from Merck & Co. Inc. (Rahway, NJ, USA). All other drugs were from Sigma Chemical Co. (St. Louis, USA). All drugs tested in patch-clamp experiments were solubilized in experimental solutions just before application onto the cell studied, i.e. only fresh solutions were tested.

**Whole-cell current recording.** The whole-cell configuration of the patch-clamp technique was used to record the high-threshold L-type  $\text{Ca}^{2+}$  current  $I_{\text{Ca,L}}$  in  $\text{Ca}^{2+}$ -tolerant frog and rat ventricular myocytes. In the routine protocols the cells were depolarized every 8 s from a holding potential of -80 to 0 mV for 200 or 400 ms. In rat cardiomyocytes, the test pulse to 0 mV was preceded by a short pre-pulse (50 ms) to -50 mV. The prepulse and/or the application of TTX were used to eliminate fast sodium currents.  $\text{K}^+$  currents were blocked by replacing all  $\text{K}^+$  ions with intracellular and extracellular  $\text{Cs}^+$ . Voltage-clamp pulses were generated and currents recorded using either a single (VP-500) or two separate patch-clamp amplifiers (RK400, Bio-Logic, Claix, France). In the latter case, when possible, two different nearby cells in the same dish were successively attached to two patch pipettes, whole-cell configuration was applied to both and two different  $I_{\text{Ca,L}}$  currents were simultaneously recorded. Visual-Patch v.1.30 (Bio-Logic) or a home-made computer software were used to control all experimental parameters, cell stimulation and current recording. Recordings were low-pass filtered at 2 kHz and stored on the hard disc of an IBM-compatible computer.

Control and drug containing solutions were applied to the exterior of the cell by placing the cell at the opening of 300- $\mu\text{m}$  inner diameter capillary tubes flowing at a rate of about 50  $\mu\text{l}/\text{min}$ . Changes in extracellular solutions were automatically achieved using a rapid solution changer (RSC-200, Bio-Logic). All experiments were done at room temperature (19-25°C), and the temperature did not vary by more than 1°C in a given experiment.

**Data analysis.** The maximal amplitude of whole-cell  $I_{\text{Ca,L}}$  was measured as previously described.(4) Currents were not compensated for capacitive and leak currents. On-line analysis of the recordings was done for each membrane depolarization, peak and steady-state current values. The results are expressed as mean  $\pm$  S.E.M. For statistical evaluation the paired and unpaired Student's *t*-test were used, and a difference was considered statistically significant when  $p$  was  $<0.05$ .

## Supplementary References

1. Skeberdis, V.A., Jurevicius, J., and Fischmeister, R. 1997. Pharmacological characterization of the receptors involved in the  $\beta$ -adrenoceptor-mediated stimulation of the L-type  $\text{Ca}^{2+}$  current in frog ventricular myocytes. *Br. J. Pharmacol.* **121**:1277-1286.
2. Blin, N., Camoin, L., Maigret, B., and Strosberg, D. 1993. Structural and conformational features determining selective signal transduction in the  $\beta_3$ -adrenergic receptor. *Mol. Pharmacol.* **44**:1094-1104.
3. Xiao, R.P., and Lakatta, E.G. 1993.  $\beta_1$ -Adrenoceptor stimulation and  $\beta_2$ -adrenoceptor stimulation differ in their effects on contraction, cytosolic  $\text{Ca}^{2+}$ , and  $\text{Ca}^{2+}$  current in single rat ventricular cells. *Circ. Res.* **73**:286-300.
4. Fischmeister, R., and Hartzell, H.C. 1986. Mechanism of action of acetylcholine on calcium current in single cells from frog ventricle. *J. Physiol.* **376**:183-202.
5. Puc at, M. et al. 1990. Neurohormonal control of calcium sensitivity of myofilaments in rat single heart cells. *Circ. Res.* **67**:517-524.
6. Verde, I., Vandecasteele, G., Lezoualc'h, F., and Fischmeister, R. 1999. Characterization of the cyclic nucleotide phosphodiesterase subtypes involved in the regulation of the L-type  $\text{Ca}^{2+}$  current in rat ventricular myocytes. *Br. J. Pharmacol.* **127**:65-74.

## Supplementary Figure Legends

### Supplementary Figure 1

$\beta_3$ -AR agonists do not stimulate  $I_{Ca,L}$  in frog ventricular myocytes. Each experiment shows the time course of  $I_{Ca,L}$  recorded in two frog myocytes which were simultaneously exposed to increasing concentrations of SR58611 (**A**), BRL37344 (**B**) or CGP12177 (**C**), or to the drugs after application of ISO (1  $\mu$ M, **A** and **C**). The individual current traces were obtained in each experimental condition at the times indicated by the corresponding letters in the main graph.

### Supplementary Figure 2

$\beta_3$ -AR agonists do not stimulate  $I_{Ca,L}$  in rat ventricular myocytes. In each experiment,  $I_{Ca,L}$  was recorded in one (**C**) or two (**A**, **B**, **D**) rat myocytes which were simultaneously exposed to increasing concentrations of CGP12177 (**A**, **B**), SR58611 (**C**) or BRL37344 (**D**) applied either in basal conditions (**A**, **D**) or in the presence of ISO (100 nM, **B** and **C**). The individual current traces in **D** were obtained at the times indicated by the corresponding letters in the main graph.



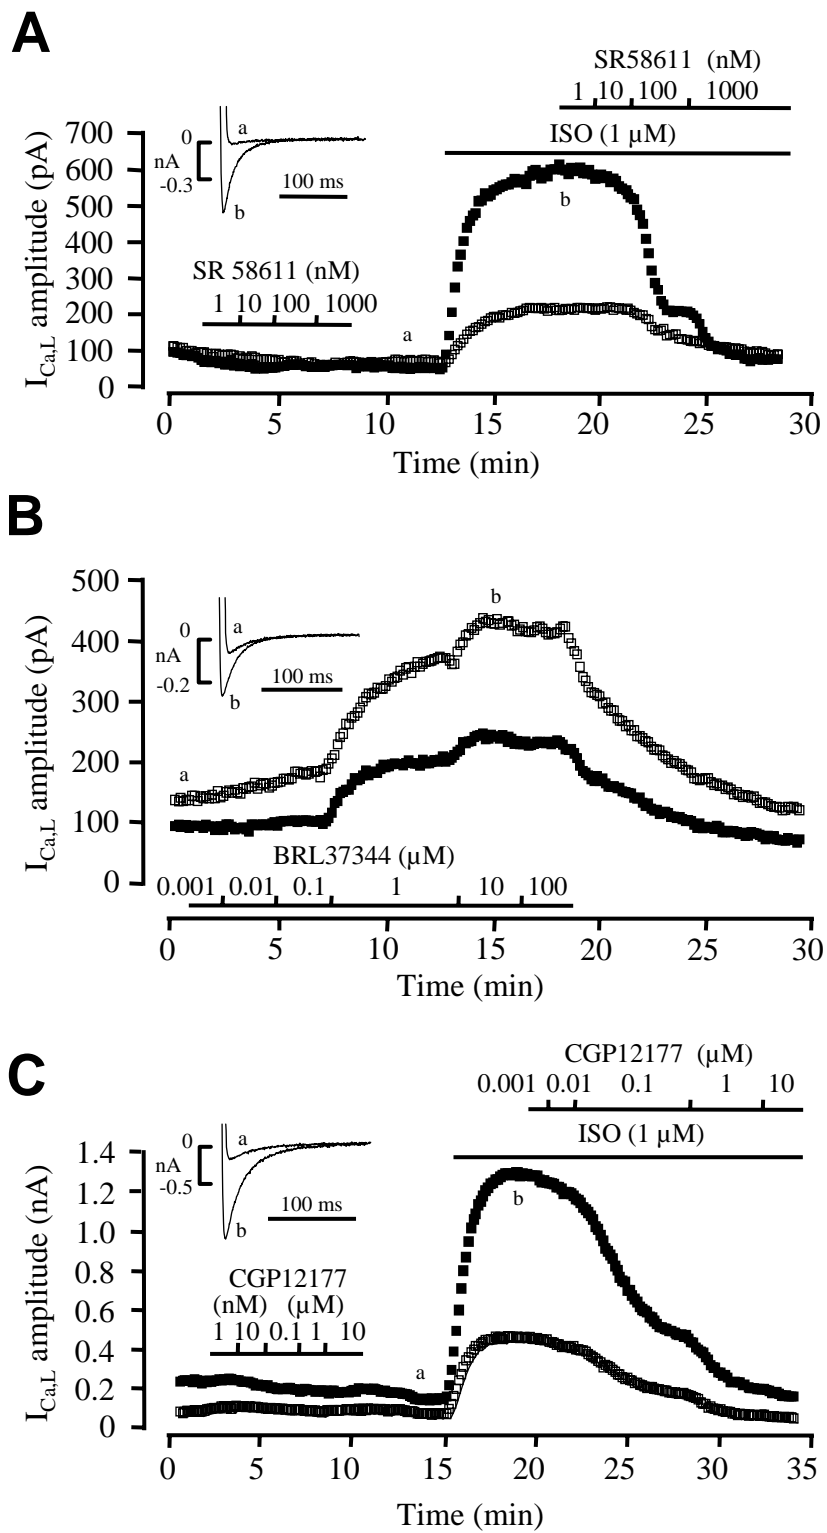

Supplemental Figure 1

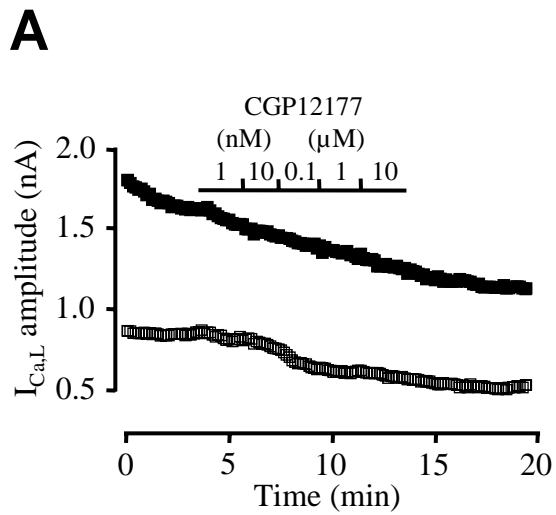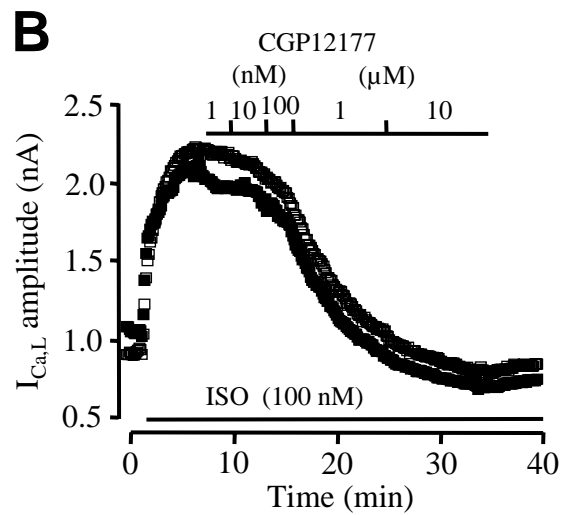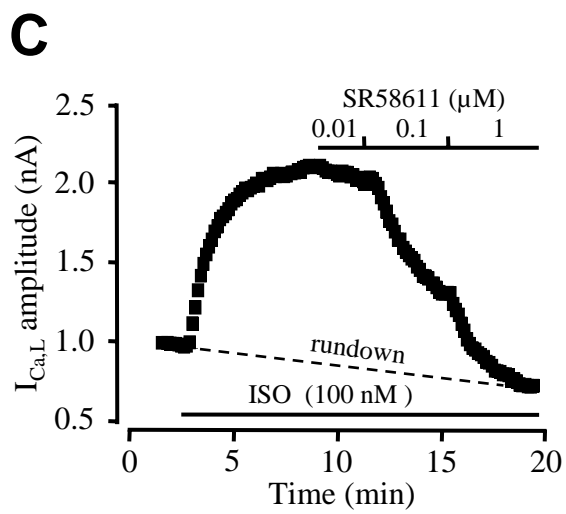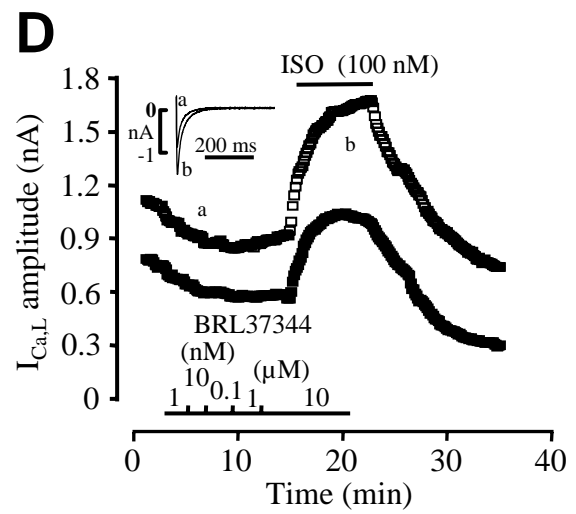

Supplemental Figure 2
